# Supplementary material for: Atg38 is required for autophagy-specific phosphatidylinositol 3-kinase complex integrity
Source: PubMed Central journal article supplement — J Cell Biol. 2013 Oct 28;203(2):299–313. doi: 10.1083/jcb.201304123 (PMC3812978; doi:10.1083/jcb.201304123), 2013-10-28
Supplement: supp_jcb.201304123_JCB_201304123_sm.pdf [file supp_jcb.201304123_JCB_201304123_sm.pdf]

Araki et al., <http://www.jcb.org/cgi/content/full/jcb.201304123/DC1>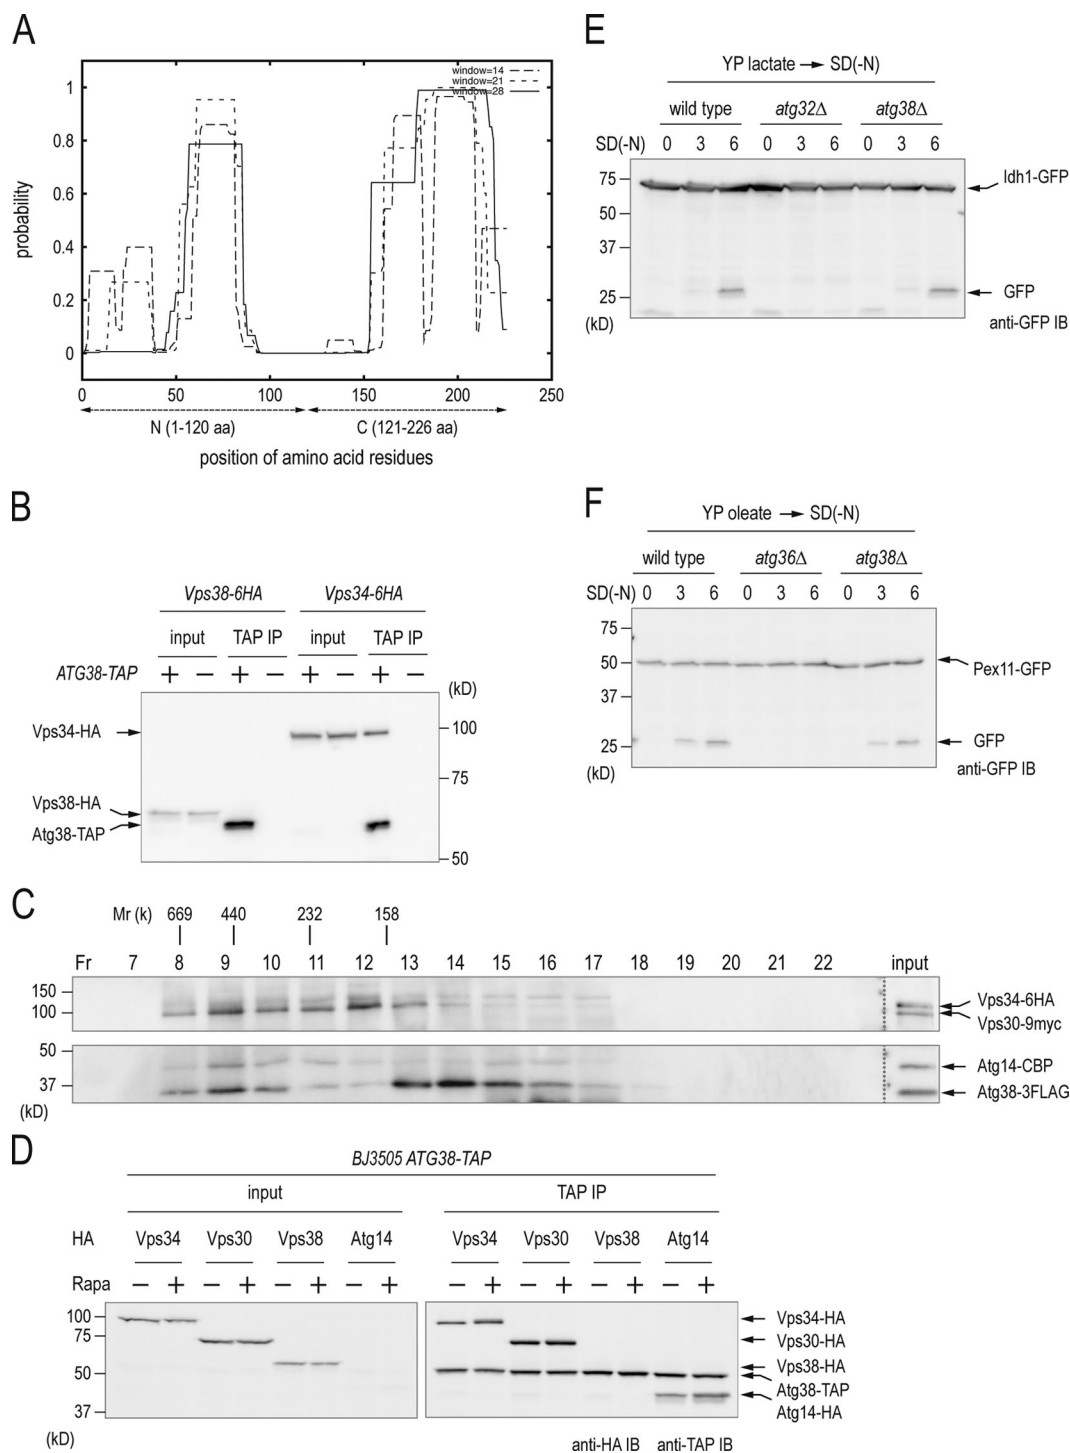

Figure S1. **Atg38 is a component of complex I.** (A) The presence of two coiled-coil domains is predicted within Atg38. (B) Cell extracts were prepared from yeast strains expressing TAP-tagged Atg38 and the indicated HA-tagged Vps38 and Vps34 proteins. The extracts were immunoprecipitated by IgG-Dynabeads. The whole-cell extract (input) and the precipitated proteins (TAP IP) were analyzed by immunoblotting with the indicated antibodies. (C) Complex I comprising Atg14-TAP was purified with IgG-Dynabeads and then eluted with TEV protease. The eluate was fractionated over a gel filtration column. Each fraction was analyzed by immunoblotting with the indicated antibodies. (D) *ATG38-TAP* cells with the indicated genotypes were grown in YPD and treated with rapamycin for 3 h at 30°C. Lysates from each group of cells were analyzed as in Fig. 1 B. (E) Cells expressing Ldh1-GFP were grown in YPL medium, then shifted to SD(-N) medium. The whole-cell extracts were analyzed by immunoblotting with anti-GFP antibody. (F) Cells expressing Pex11-GFP were grown in YM2 oleate medium, then shifted to SD(-N) medium. The whole-cell extracts were analyzed by immunoblotting with anti-GFP antibody.



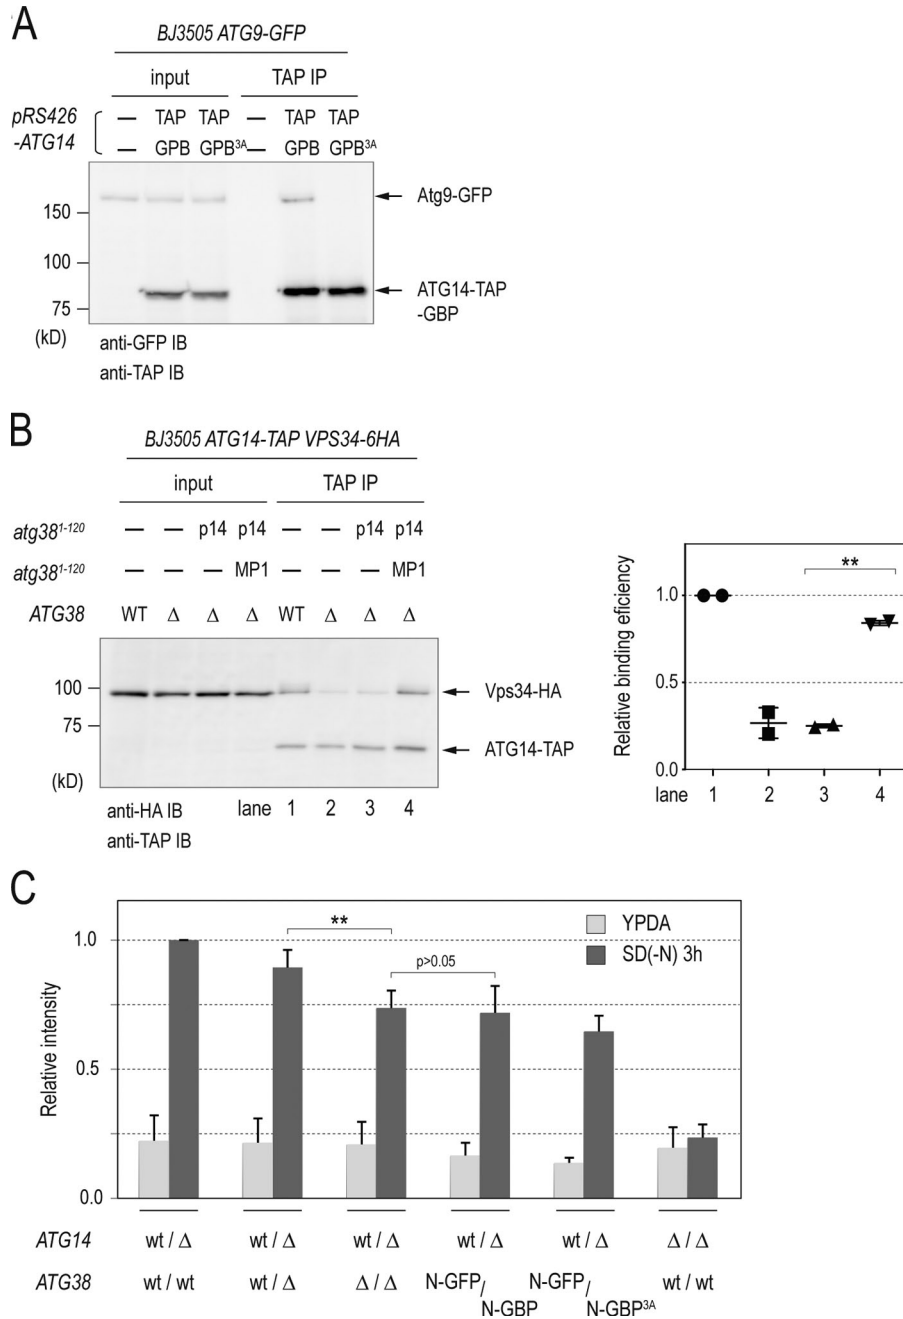

Figure S3. **An artificial tether facilitates the formation of PI3K complex I, but does not restore the defect in autophagy in *atg38Δ* cells.** (A) Introduction of three mutations (S33A R35A Y37A) to GBP compromises its interaction with GFP. Cell extracts were prepared from *ATG9-GFP atg14Δ* strains carrying the indicated *ATG14* constructs. The cell extracts were immunoprecipitated with IgG-Dynabeads. The precipitated proteins (TAP IP), together with the whole-cell extracts (input), were immunoblotted with the indicated antibodies. (B) Cell extracts were prepared from *ATG14-TAP* and either *VPS34-6HA* or *VPS15-6HA* strains expressing *Atg38<sup>1-120</sup>* fused with p14 and MP1. Interactions between the indicated proteins were analyzed as in A (left). Relative binding efficiency was determined as described in Fig. 3 A. Relative binding efficiency is shown as mean  $\pm$  SD of two independent experiments (right). (C) Cells expressing *Pho8Δ60* were grown in YPD and shifted to SD(-N) medium for 3 h at 30°C. Lysates from each group of cells were tested for ALP activity. ALP activity is shown as mean  $\pm$  SD of three independent experiments with the activity of wild-type cells normalized to 1.

Table S1. Yeast strains

| Name    | Genotype                                                                                                                                                                                                                      | Figure used                                 |
|---------|-------------------------------------------------------------------------------------------------------------------------------------------------------------------------------------------------------------------------------|---------------------------------------------|
| BJ3505  | <i>MATa pep4::HIS3 prb1-D1.6R HIS3 lys2-208 trp1-D101 ura3-52 gal2 can1</i>                                                                                                                                                   | S2 A; Jones et al., 1982                    |
| BY4741  | <i>MATa his3Δ1 leu2Δ0 met15Δ0 ura3Δ0</i>                                                                                                                                                                                      | Brachmann et al., 1998                      |
| BY4743  | <i>MATa/alpha his3Δ1/his3Δ1 leu2Δ0/leu2Δ0 LYS2/lys2Δ0 met15Δ0/MET15 ura3Δ0/ura3Δ0</i>                                                                                                                                         | Brachmann et al., 1998                      |
| YAY1187 | BJ3505 <i>VPS34-TAP-hphNT1</i>                                                                                                                                                                                                | 1 A                                         |
| YAY1298 | BJ3505 <i>VPS34-6HA-natNT2</i>                                                                                                                                                                                                | 1 B, 1 D, S1 B                              |
| YAY1299 | BJ3505 <i>VPS15-6HA-natNT2</i>                                                                                                                                                                                                | 1 B, 1 D                                    |
| YAY1300 | BJ3505 <i>VPS30-6HA-natNT2</i>                                                                                                                                                                                                | 1 B, 1 D                                    |
| YAY1301 | BJ3505 <i>VPS38-6HA-natNT2</i>                                                                                                                                                                                                | 1 B, S1 B                                   |
| YAY1302 | BJ3505 <i>ATG14-6HA-natNT2</i>                                                                                                                                                                                                | 1 B                                         |
| YAY1318 | BJ3505 <i>ATG38-TAP-hphNT1 VPS34-6HA-natNT2</i>                                                                                                                                                                               | 1 B, 1 D, S1 B, S1 D                        |
| YAY1319 | BJ3505 <i>ATG38-TAP-hphNT1 VPS15-6HA-natNT2</i>                                                                                                                                                                               | 1 B, 1 D                                    |
| YAY1320 | BJ3505 <i>ATG38-TAP-hphNT1 VPS30-6HA-natNT2</i>                                                                                                                                                                               | 1 B, 1 D, S1 D                              |
| YAY1321 | BJ3505 <i>ATG38-TAP-hphNT1 VPS38-6HA-natNT2</i>                                                                                                                                                                               | 1 B, S1 B, S1 D                             |
| YAY1322 | BJ3505 <i>ATG38-TAP-hphNT1 ATG14-6HA-natNT2</i>                                                                                                                                                                               | 1 B, S1 D                                   |
| YAY1303 | BJ3505 <i>ATG38-TAP-hphNT1</i>                                                                                                                                                                                                | 1 C                                         |
| YAY1358 | BJ3505 <i>VPS34-6HA-natNT2 ATG14-TAP-hphNT1</i>                                                                                                                                                                               | 1 C, 4 A, 4 B, 7 A, S3 B                    |
| YAY1355 | BJ3505 <i>ATG38-TAP-hphNT1 VPS34-6HA-natNT2 atg14Δ::kanMX4</i>                                                                                                                                                                | 1 D                                         |
| YAY1356 | BJ3505 <i>ATG38-TAP-hphNT1 VPS15-6HA-natNT2 atg14Δ::kanMX4</i>                                                                                                                                                                | 1 D, S2 A                                   |
| YAY1357 | BJ3505 <i>ATG38-TAP-hphNT1 VPS30-6HA-natNT2 atg14Δ::kanMX4</i>                                                                                                                                                                | 1 D                                         |
| YAY1394 | BY4741 <i>ATG17-2mcherry-hphNT1 ATG38-2GFP-kanMX6</i>                                                                                                                                                                         | 1 E                                         |
| YAY1427 | BY4741 <i>ATG17-2mcherry-hphNT1 ATG38-2GFP-kanMX6 atg14Δ::natNT2</i>                                                                                                                                                          | 1 E                                         |
| TK1050  | BY4741 <i>kanMX4-GPD promoter-pho8Δ60</i>                                                                                                                                                                                     | 2 A, 2 B, 2 C                               |
| YAY1332 | BY4741 <i>kanMX4-GPD promoter-pho8Δ60 atg38Δ::natNT2</i>                                                                                                                                                                      | 2 A, 2 B, 2 C, 4 C                          |
| YAY1334 | BY4741 <i>kanMX4-GPD promoter-pho8Δ60 atg14Δ::natNT2</i>                                                                                                                                                                      | 2 A, 2 B, 2 C                               |
| YAY1640 | BY4741 <i>kanMX4-GPD promoter-pho8Δ60 ATG14-yeGFP-hphNT1</i>                                                                                                                                                                  | 2 A, 2 B                                    |
| YAY1641 | BY4741 <i>kanMX4-GPD promoter-pho8Δ60 atg38Δ::CgURA3 ATG14-yeGFP-hphNT1</i>                                                                                                                                                   | 2 A, 2 B                                    |
| YAY1414 | BY4741 <i>kanMX4-GPD promoter-pho8Δ60 vps30Δ::natNT2</i>                                                                                                                                                                      | 2 C                                         |
| YAY1778 | BY4741 <i>ATG17-2mcherry-hphNT1 mRFP-APE1-URA3 VPS34-3myeGFP-KanMX6</i>                                                                                                                                                       | 3A, 3B                                      |
| YAY1781 | BY4741 <i>ATG17-2mcherry-hphNT1 mRFP-APE1-URA3 VPS34-3myeGFP-KanMX6 atg38Δ::natNT2</i>                                                                                                                                        | 3A, 3B                                      |
| YAY1780 | BY4741 <i>ATG17-2mcherry-hphNT1 mRFP-APE1-URA3 VPS30-3myeGFP-KanMX6</i>                                                                                                                                                       | 3A                                          |
| YAY1783 | BY4741 <i>ATG17-2mcherry-hphNT1 mRFP-APE1-URA3 VPS30-3myeGFP-KanMX6 atg38Δ::natNT2</i>                                                                                                                                        | 3A                                          |
| YAY1776 | BY4741 <i>ATG17-2mcherry-hphNT1 mRFP-APE1-URA3 ATG14-3myeGFP-KanMX6</i>                                                                                                                                                       | 3A, 3B                                      |
| YAY1777 | BY4741 <i>ATG17-2mcherry-hphNT1 mRFP-APE1-URA3 ATG14-3myeGFP-KanMX6 atg38Δ::natNT2</i>                                                                                                                                        | 3A, 3B                                      |
| YAY1774 | BY4741 <i>ATG17-2mcherry-hphNT1 mRFP-APE1-URA3 ATG2-3myeGFP-KanMX6</i>                                                                                                                                                        | 3A                                          |
| YAY1786 | BY4741 <i>ATG17-2mcherry-hphNT1 mRFP-APE1-URA3 ATG2-3myeGFP-KanMX6 atg38Δ::natNT2</i>                                                                                                                                         | 3A                                          |
| YAY1359 | BJ3505 <i>VPS15-6HA-natNT2 ATG14-TAP-hphNT1</i>                                                                                                                                                                               | 4 A, 7 A, S3 B                              |
| YAY1360 | BJ3505 <i>VPS30-6HA-natNT2 ATG14-TAP-hphNT1</i>                                                                                                                                                                               | 4 A                                         |
| YAY1368 | BJ3505 <i>VPS34-6HA-natNT2 ATG14-TAP-hphNT1 atg38Δ::kanMX4</i>                                                                                                                                                                | 4 A, 4 B, 7 A, S3 B                         |
| YAY1369 | BJ3505 <i>VPS30-6HA-natNT2 ATG14-TAP-hphNT1 atg38Δ::kanMX4</i>                                                                                                                                                                | 4 A, 7 A, S3 B                              |
| YAY1370 | BJ3505 <i>VPS15-6HA-natNT2 ATG14-TAP-hphNT1 atg38Δ::kanMX4</i>                                                                                                                                                                | 4 A                                         |
| YAY1390 | BJ3505 <i>VPS34-6HA-natNT2 ATG14-TAP-hphNT1 atg38Δ::kanMX4 ATG38<sup>1-120</sup>-yEGFP-URA3 ATG38<sup>1-120</sup>-GBP6His-TRP</i>                                                                                             | 4 B, 7 A                                    |
| YAY1814 | BY4741 <i>kanMX4-GPD promoter-pho8Δ60 ATG14-TAP-hphNT1</i>                                                                                                                                                                    | 4 C                                         |
| YAY1815 | BY4741 <i>kanMX4-GPD promoter-pho8Δ60 atg38Δ::CgURA3 ATG14-TAP-hphNT1</i>                                                                                                                                                     | 4 C                                         |
| YAY1536 | BJ3505 <i>VPS34-6HA-natNT2 ATG14-TAP-hphNT1 VPS30-9myc-klTRP1 ATG38-3FLAG-10His-kanMX4</i>                                                                                                                                    | 4 D, S1 C                                   |
| AH109   | <i>MATa, trp1-901, leu2-3, 112, ura3-52, his3-200, gal4Δ, gal80Δ, LYS2::GAL1<sub>UAS</sub> GAL1<sub>TATA</sub>-HIS3, MEL1, GAL2<sub>UAS</sub>-GAL2<sub>TATA</sub>-ADE2, URA3::MEL1<sub>UAS</sub>-MEL1<sub>TATA</sub>-lacZ</i> | 5 A, 5 B, 6 A, S2 B, S2 D (Takara Bio Inc.) |
| YAY1531 | BJ3505 <i>VPS34-TAP-hphNT1 atg14Δ::natNT2 vps38Δ::kanMX4 vps30Δ::CgTRP1</i>                                                                                                                                                   | 5 C                                         |
| YAY1391 | BJ3505 <i>VPS34-6HA-natNT2 ATG14-TAP-hphNT1 atg38Δ::kanMX4 ATG38<sup>1-120</sup>-yEGFP-URA3 ATG38<sup>1-120</sup>-GBP<sup>3A</sup>6His-TRP</i>                                                                                | 7 A                                         |
| YAY1392 | BJ3505 <i>VPS15-6HA-natNT2 ATG14-TAP-hphNT1 atg38Δ::kanMX4 ATG38<sup>1-120</sup>-yEGFP-URA3 ATG38<sup>1-120</sup>-GBP6His-TRP</i>                                                                                             | 7 A                                         |

Table S1. Yeast strains (Continued)

| Name    | Genotype                                                                                                                                                     | Figure used |
|---------|--------------------------------------------------------------------------------------------------------------------------------------------------------------|-------------|
| YAY1393 | BJ3505 VPS15-6HA-natNT2 ATG14-TAP-hphNT1 atg38Δ::kanMX4<br>ATG38 <sup>1-120</sup> -yEGFP-URA3 ATG38 <sup>1-120</sup> -GBP <sup>3A</sup> 6His-TRP             | 7 A         |
| YKM65   | BY4741 ADHp-OsTIR1-9myc-URA3 IDH1-GFP-kanMX6                                                                                                                 | S1 E        |
| YKM90   | BY4741 ADHp-OsTIR1-9myc-URA3 IDH1-GFP-kanMX6 atg32Δ::hphNT1                                                                                                  | S1 E        |
| YAY1733 | BY4741 ADHp-OsTIR1-9myc-URA3 IDH1-GFP-kanMX6 atg38Δ::hphNT1                                                                                                  | S1 E        |
| YNH798  | BY4741 ADHp-OsTIR1-9myc-URA3 PEX11-eGFP-kanMX4                                                                                                               | S1 F        |
| YNH799  | BY4741 ADHp-OsTIR1-9myc-URA3 PEX11-eGFP-kanMX4 atg36Δ::natNT2                                                                                                | S1 F        |
| YAY1747 | BY4741 ADHp-OsTIR1-9myc-URA3 PEX11-eGFP-kanMX4 atg38Δ::natNT2                                                                                                | S1 F        |
| YAY1541 | BJ3505 ATG9-yEGFP-kanMX4                                                                                                                                     | S3 A        |
| YAY1436 | BJ3505 VPS34-6HA-natNT2 ATG14-TAP-hphNT1 atg38Δ::kanMX4<br>ATG38 <sup>1-120</sup> -p14-TRP1                                                                  | S3 B        |
| YAY1459 | BJ3505 VPS34-6HA-natNT2 ATG14-TAP-hphNT1 atg38Δ::kanMX4<br>ATG38 <sup>1-120</sup> -p14-TRP1 ATG38 <sup>1-120</sup> -MPI-URA3.                                | S3 B        |
| YAY1583 | BY4743 kanMX4-GPD promoter-pho8Δ60/pho8Δ ATG14/atg14ΔATG38/atg38Δ                                                                                            | S3 C        |
| YAY1584 | BY4743 kanMX4-GPD promoter-pho8Δ60/pho8Δ ATG14/atg14Δ atg38Δ/atg38Δ                                                                                          | S3 C        |
| YAY1585 | BY4743 kanMX4-GPD promoter-pho8Δ60/pho8Δ ATG14/atg14ΔATG38/ATG38                                                                                             | S3 C        |
| YAY1586 | BY4743 kanMX4-GPD promoter-pho8Δ60/pho8Δ atg14Δ/atg14ΔATG38/ATG38                                                                                            | S3 C        |
| YAY1587 | BY4743 kanMX4-GPD promoter-pho8Δ60/pho8Δ ATG14/atg14Δ atg38Δ/atg38Δ<br>ATG38 <sup>1-120</sup> -yEGFP-URA3 ATG38 <sup>1-120</sup> -GBP6His-HIS3               | S3 C        |
| YAY1588 | BY4743 kanMX4-GPD promoter-pho8Δ60/pho8Δ ATG14/atg14Δatg38Δ/atg38Δ<br>ATG38 <sup>1-120</sup> -yEGFP-URA3 ATG38 <sup>1-120</sup> -GBP <sup>3A</sup> 6His-HIS3 | S3 C        |

Table S2. Plasmids

| Name           | Description                                      | Figure used           |
|----------------|--------------------------------------------------|-----------------------|
| pGBKT7-p53     | pGBKT7-p53                                       | 5 A (Takara Bio Inc.) |
| pGADT7-large T | pGADT7-large T                                   | 5 A (Takara Bio Inc.) |
| pYA259         | pGADT7-VPS30                                     | 5 A                   |
| pYA260         | pGADT7-ATG14                                     | 5 A, 5 B, S2 D        |
| pYA261         | pGADT7-VPS34                                     | 5 A, S2 D             |
| pYA633         | pGADT7-ATG38                                     | 5 A, 5 B, 6 A, S2 B   |
| pYA643         | pGBKT7-ATG38                                     | 5 A, 5 B, 6 A, S2 B   |
| pYA656         | pGADT7-ATG38 <sup>1-120</sup>                    | 5 B, 6 A              |
| pYA657         | pGADT7-ATG38 <sup>121-226</sup>                  | 5 B, 6 A              |
| pYA638         | pGEX6P-ATG38                                     | 5 C, 6 B, 6 C         |
| pYA658         | pGEX6P-ATG38 <sup>1-120</sup>                    | 5 C                   |
| pYA659         | pGEX6P-ATG38 <sup>121-226</sup>                  | 5 C                   |
| pYA662         | pGBKT7-ATG38 <sup>1-120</sup>                    | 5 A                   |
| pYA664         | pGBKT7-ATG38 <sup>c121-226</sup>                 | 5 A                   |
| pOK15          | pRS426-ATG14-3HA-yEGFP                           | S2 A                  |
| pOK16          | pRS426-ATG14 <sup>61-344</sup> -3HA-yEGFP        | S2 A                  |
| pOK17          | pRS426-ATG14 <sup>123-344</sup> -3HA-yEGFP       | S2 A                  |
| pOK18          | pRS426-ATG14 <sup>157-344</sup> -3HA-yEGFP       | S2 A                  |
| pOK19          | pRS426-ATG14 <sup>1-167</sup> -3HA-yEGFP         | S2 A                  |
| pOK20          | pRS426-ATG14 <sup>1-73+123-344</sup> -3HA-yEGFP  | S2 A                  |
| pOK21          | pRS426-ATG14 <sup>1-128+157-344</sup> -3HA-yEGFP | S2 A                  |
| pOK22          | pRS426-ATG14 <sup>1-128</sup> -3HA-yEGFP         | S2 A                  |
| pOK26          | pRS426-ATG146 <sup>1-73</sup> -3HA-yEGFP         | S2 A                  |
| pOK27          | pRS426-ATG146 <sup>61-128</sup> -3HA-yEGFP       | S2 A                  |
| pOK31          | pRS426-ATG146 <sup>61-167</sup> -3HA-yEGFP       | S2 A                  |
| pOK32          | pRS426-ATG146 <sup>123-167</sup> -3HA-yEGFP      | S2 A                  |
| pOK33          | pRS426-ATG146 <sup>1-73+123-167</sup> -3HA-yEGFP | S2 A                  |
| pYA874         | pGADT7-ATG38 <sup>1-80</sup>                     | S2 D                  |
| pYA875         | pGADT7-ATG38 <sup>81-226</sup>                   | S2 D                  |
| pYA775         | pPS306-ATG14-TAP-GBP <sup>3A</sup>               | S3 A                  |
| pYA777         | pPS306-ATG14-TAP-GBP                             | S3 A                  |

Table S3 is available as a Microsoft Excel file.

## References

- Brachmann, C.B., A. Davies, G.J. Cost, E. Caputo, J. Li, P. Hieter, and J.D. Boeke. 1998. Designer deletion strains derived from *Saccharomyces cerevisiae* S288C: a useful set of strains and plasmids for PCR-mediated gene disruption and other applications. *Yeast*. 14:115–132. [http://dx.doi.org/10.1002/\(SICI\)1097-0061\(19980130\)14:2<115::AID-YEA204>3.0.CO;2-2](http://dx.doi.org/10.1002/(SICI)1097-0061(19980130)14:2<115::AID-YEA204>3.0.CO;2-2)
- Jones, E.W., G.S. Zubenko, and R.R. Parker. 1982. *PEP4* gene function is required for expression of several vacuolar hydrolases in *Saccharomyces cerevisiae*. *Genetics*. 102:665–677.
